# Supplementary material for: High-Energy Long-Lived Emitting Mixed Excitons in Homopolymeric Adenine-Thymine DNA Duplexes
Source: MDPI journal article supplement (doi:10.3390/molecules27113558), 2022-05-31
Supplement: s1 [file s1]

# High-energy long-lived emitting mixed excitons in homopolymeric adenine-thymine DNA duplexes

Ignacio Vayá<sup>1,2</sup>, Thomas Gustavsson<sup>2</sup> and Dimitra Markovitsi<sup>2,3\*</sup>

<sup>1</sup> Departamento de Química, Instituto de Tecnología Química UPV-CSIC, Universitat Politècnica de València, 46022, Valencia, Spain;

igvapre@qim.upv.es (I.V.)

<sup>2</sup> Université Paris-Saclay, CEA, CNRS, LIDYL, F-91191 Gif-sur-Yvette, France;

thomas.gustavsson@cea.fr (T.G.)

<sup>3</sup> Université Paris-Saclay, CNRS, Institut de Chimie Physique, UMR8000, 91405 Orsay, France

dimitra.markovitsi@universite-paris-saclay.fr (D.M.)

\* Correspondence: [dimitra.markovitsi@universite-paris-saclay.fr](mailto:dimitra.markovitsi@universite-paris-saclay.fr)

## SUPPORTING INFORMATION

Figure S1: Time-resolved fluorescence spectra

Figure S2: Fits of the fluorescence decays

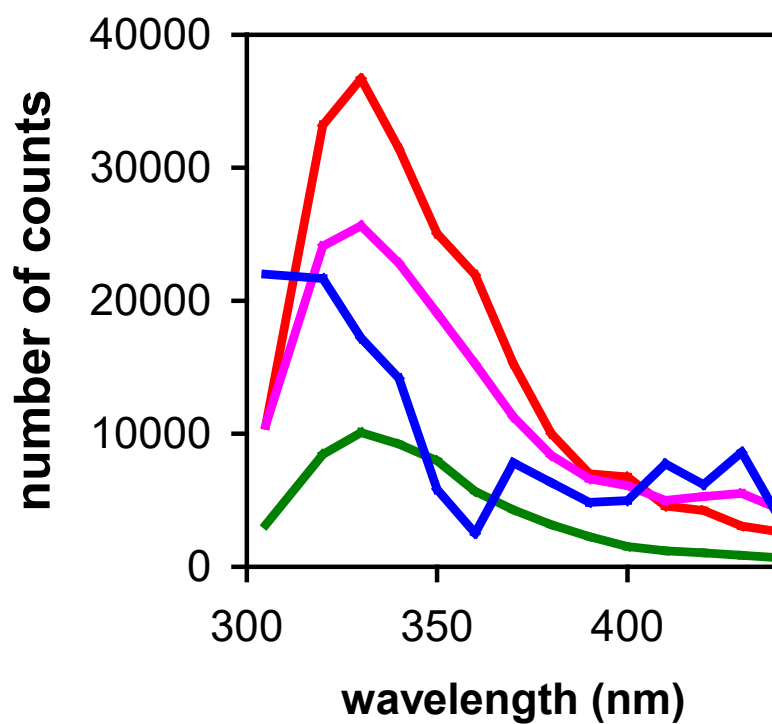

**Figure S1.** Time-resolved fluorescence spectra, non-corrected for the response of the detection system, determined for pA•pT by integrating the photons emitted on four time-windows: -10 -10 ps (green), 10 – 100 ps (pink), 0.1 -1 ns (red), and 1 - 10 ns (blue).

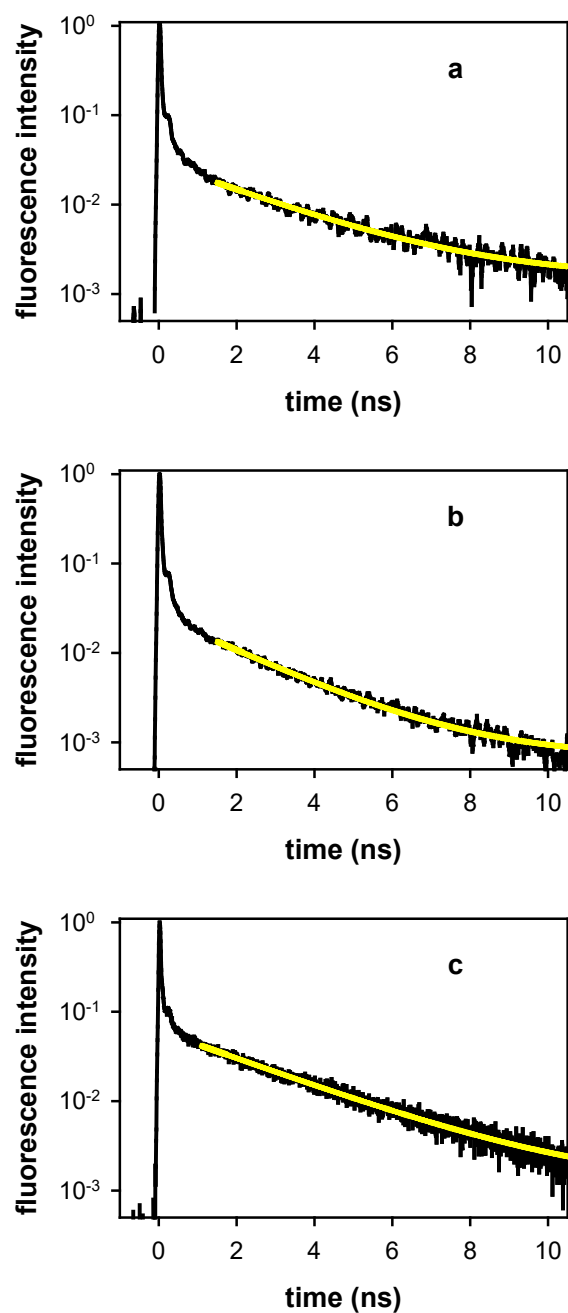

**Figure S2.** Fits of the fluorescence decays recorded at 305 nm with mono-exponential functions performed on the 1.5 – 10.5 ns range. (a) pA•pT, excitation wavelength: 267 nm; (b) pA•pT, excitation wavelength 285 nm; (b) A<sub>20</sub>•T<sub>20</sub>, excitation wavelength: 285 nm.
